# Supplementary material for: Effects of Superficial Scratching and Engineered Nanomaterials on Skin Gene Profiles and Microbiota in SKH-1 Mice
Source: MDPI journal article supplement (doi:10.3390/ijms242115629), 2023-10-26
Supplement: s1 [file s1]

**A**

7 d ZnO vs 7 d control

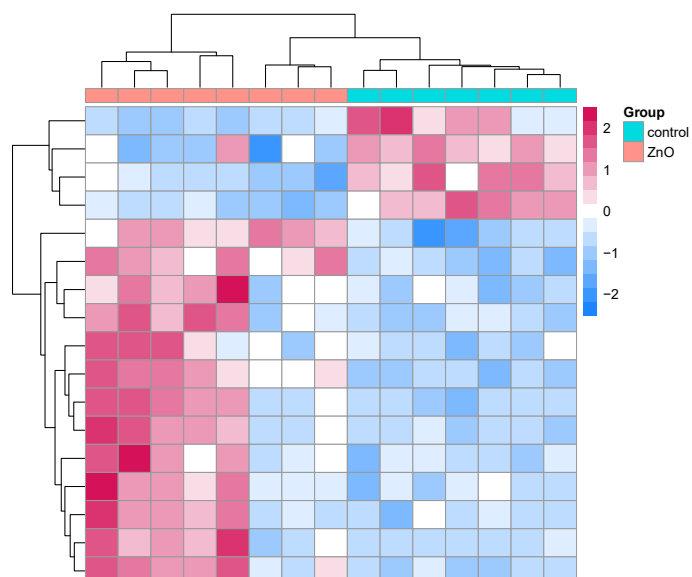**B**

7 d Ag vs 7 d control

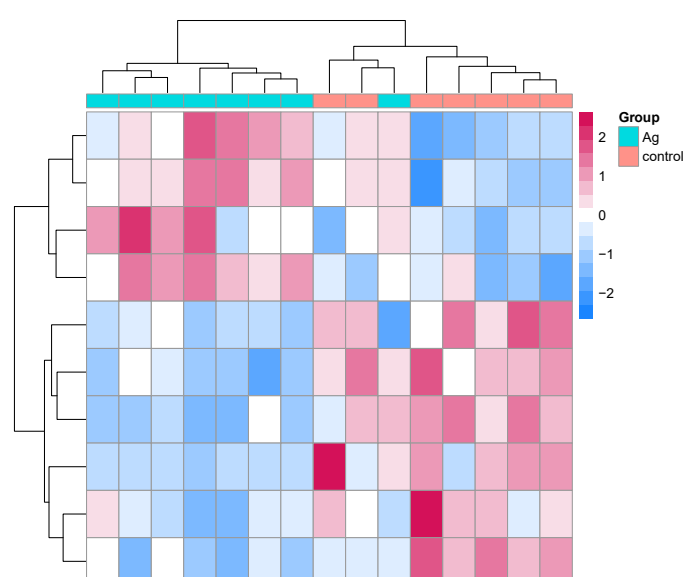**C**

7 d ZnO vs 7 d control

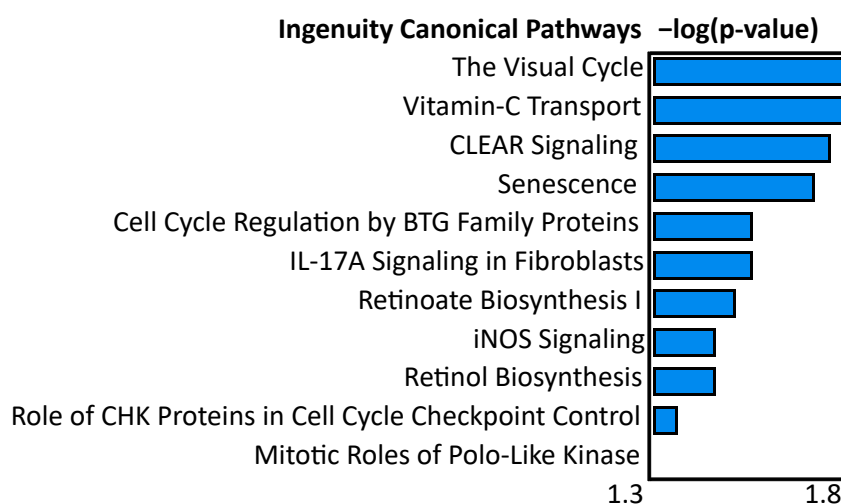**D**

7 d Ag vs 7 d control

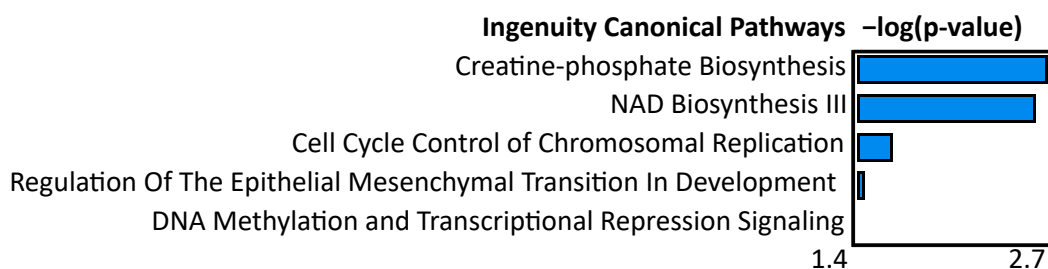

**Figure S3.** DEGs between nanomaterial treated and control groups at 7 d. **(A)** A heatmap of the 17 DEGs between 7 d nZnO group and 7 d control group. **(B)** A heatmap of the 10 DEGs between 7 d nAg group and 7 d control group. **(C)** DEGs between 7 d nZnO and 7 d control group enriched to cell signalling pathways. **(D)** DEGs between 7 d nAg and 7 d control group include biosynthesis pathways. DEGs are arranged by their p values. Canonical pathway analyses were performed with Qiagen IPA.
