# Supplementary material for: Effects of Superficial Scratching and Engineered Nanomaterials on Skin Gene Profiles and Microbiota in SKH-1 Mice
Source: MDPI journal article supplement (doi:10.3390/ijms242115629), 2023-10-26
Supplement: s1 [file s1]

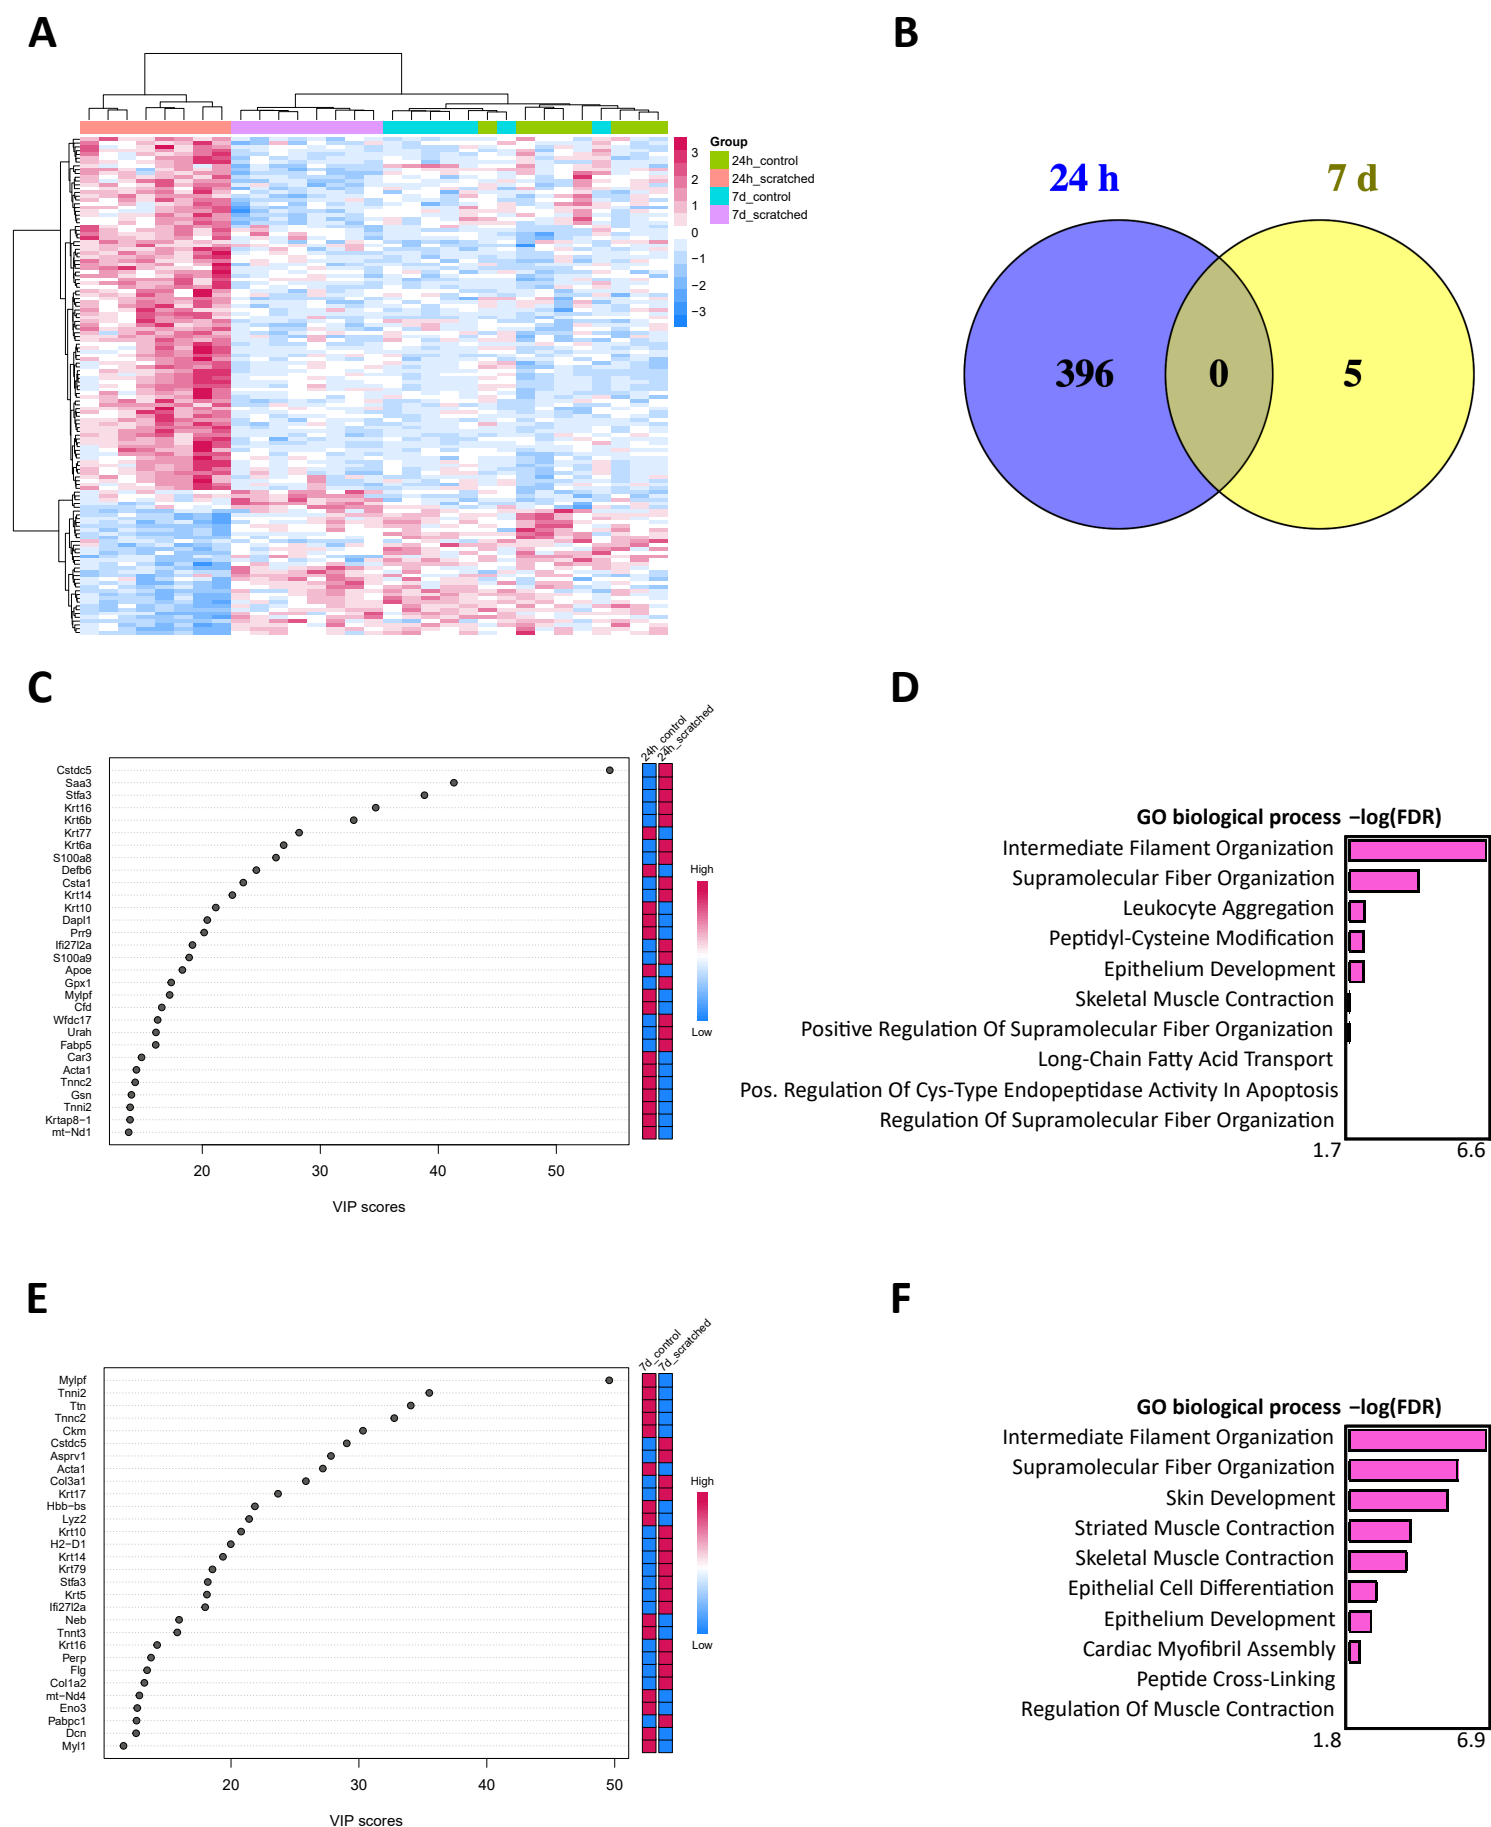

**Figure S1.** Most discriminatory and differentially expressed genes and biological processes in the scratched groups. **(A)** Heatmap of the top 150 most discriminatory genes, based on ANOVA. **(B)** Venn diagram of the 401 DEGs at 24 h and 7 d timepoints. PLS-DA analysis shows the top 30 genes based on their VIP scores at 24 h and their GO biological processes at 24 h (**C-D**) and at 7 d (**E-F**). The associated heatmaps in graphs C-D indicate upregulated (red) or downregulated (blue) expression of the genes in scratched versus control skins. For the heatmap, Euclidean clustering distances were used with the Ward D2 method.
