# Supplementary material for: Effects of Superficial Scratching and Engineered Nanomaterials on Skin Gene Profiles and Microbiota in SKH-1 Mice
Source: Int J Mol Sci. 2023 Oct 26;24(21):15629. doi: 10.3390/ijms242115629 (PMC10649582; doi:10.3390/ijms242115629)
Supplement: Supplementary file 1 [file ijms-24-15629-s001.zip]

Archive with 6 entries (6 files):
- FIGS1.pdf
- __MACOSX/._FIGS1.pdf
- FIGS2.pdf
- __MACOSX/._FIGS2.pdf
- FIGS3.pdf
- __MACOSX/._FIGS3.pdf
