# Supplementary figures and images for: Effects of Superficial Scratching and Engineered Nanomaterials on Skin Gene Profiles and Microbiota in SKH-1 Mice
Source: MDPI journal article supplement (doi:10.3390/ijms242115629), 2023-10-26

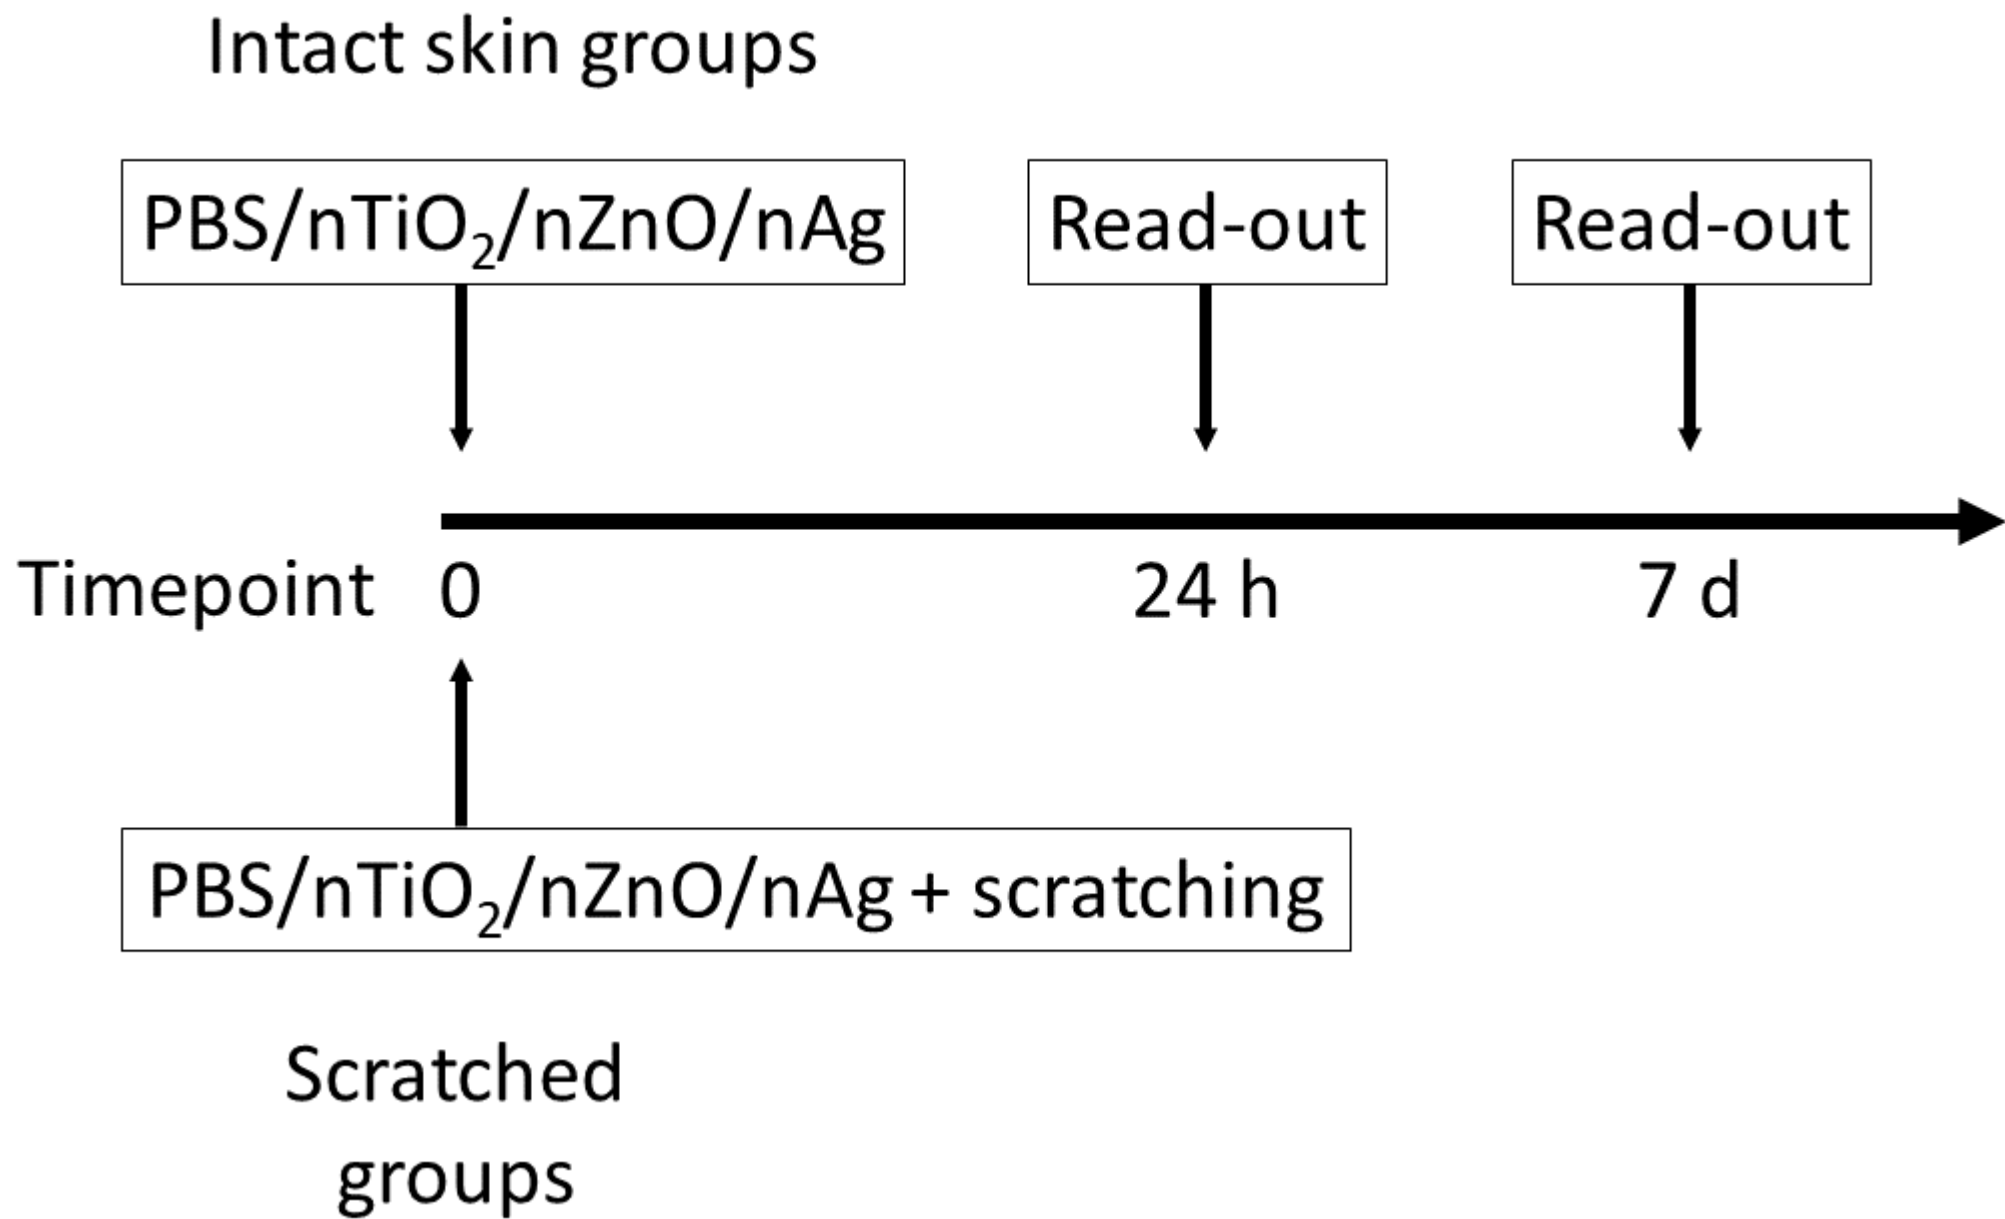

**Figure S2.** Schematic of the *in vivo* experiment.

Supplement: s1 [file s1]
